# Supplementary material for: Retracted: Hyaluronan Activation of the Nlrp3 Inflammasome Contributes to the Development of Airway Hyperresponsiveness
Source: PubMed Central journal article supplement (PMC3546367; doi:10.1289/ehp.1205188), 2012-09-24
Supplement: ehp.1205188.s001.pdf [file ehp.1205188.s001.pdf]

**SUPPLEMENTAL MATERIAL:**

**Hyaluronan Activation of the Nlrp3 Inflammasome Contributes to the Development of  
Airway Hyperresponsiveness**

Feifei Feng<sup>1,2</sup>, Zhuowei Li<sup>1</sup>, Erin N. Potts-Kant<sup>1</sup>, Yiming Wu<sup>2</sup>, W. Michael Foster<sup>1</sup>,  
Kristi L. Williams<sup>1,3†</sup>, and John W. Hollingsworth<sup>1,4†\*</sup>

<sup>1</sup>Department of Medicine, Division of Pulmonary, Allergy, and Critical Care Medicine, School of Medicine, Duke University Medical Center, Durham, North Carolina, USA

<sup>2</sup>Department of Occupational and Environmental Health, College of Public Health, Zhengzhou University, Zhengzhou, Henan, China

<sup>3</sup>School of Nursing, Duke University Medical Center, Durham, North Carolina, USA

<sup>4</sup>Department of Immunology, School of Medicine, Duke University Medical Center, Durham, North Carolina, USA

**Running Title:** Hyaluronan activation of the inflammasome and environmental airways disease

**Acknowledgements:** This work was supported by National Institutes of Health grants ES016126, AI081672, ES020350 & ES020426 (to JWH), AI089756 (to K LW), and an unrestricted educational grant from the China Scholarship Council (to FF).

**\*Corresponding Author:** John W. Hollingsworth M.D., Division of Pulmonary, Allergy, and Critical Care Medicine, Department of Medicine, Duke University School of Medicine, DUMC 103004, 106 Research Drive, Durham, NC 27710, USA; Phone: (919) 684-4588, Fax: (919) 684-5266; E-mail: [john.hollingsworth@duke.edu](mailto:john.hollingsworth@duke.edu)

## **Table of Contents**

**Page 3.** Figure S1: RNA expression of *IL-1 $\beta$*  and *IL-18* in whole lung macrophages.

**Page 4.** Figure S2. Level of non-inflammasome pro-inflammatory factors in BAL at 24 hours after ozone exposure.

**Page 5.** Figure S3. Biological response to hyaluronan and genes of the Nlrp3-inflammasome.

**Page 6.** Figure S4. Level of non-inflammasome pro-inflammatory factors in the BAL after HA exposure.

## Supplement Figures

Figure S1.

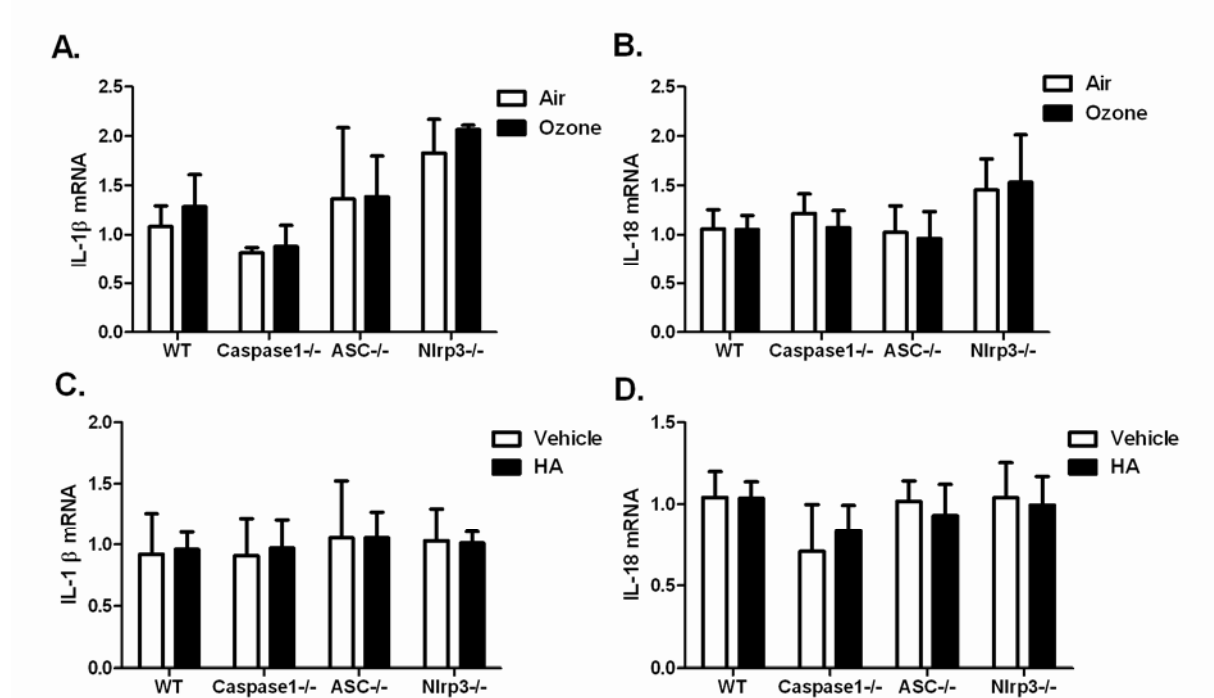

**Figure S1: RNA expression of *IL-1β* and *IL-18* in whole lung macrophages.** (A/B) Whole lung macrophages were isolated after exposure to ozone and evaluated for mRNA expression of *IL-1β* and *IL-18* by real-time PCR and no differences were detected. (C/D) Whole lung macrophages were isolated after exposure to hyaluronan fragments and evaluated for mRNA expression of *IL-1β* and *IL-18* by real-time PCR and no differences were detected. Data presented as mean ± SEM (n=5/group).

**Figure S2.**

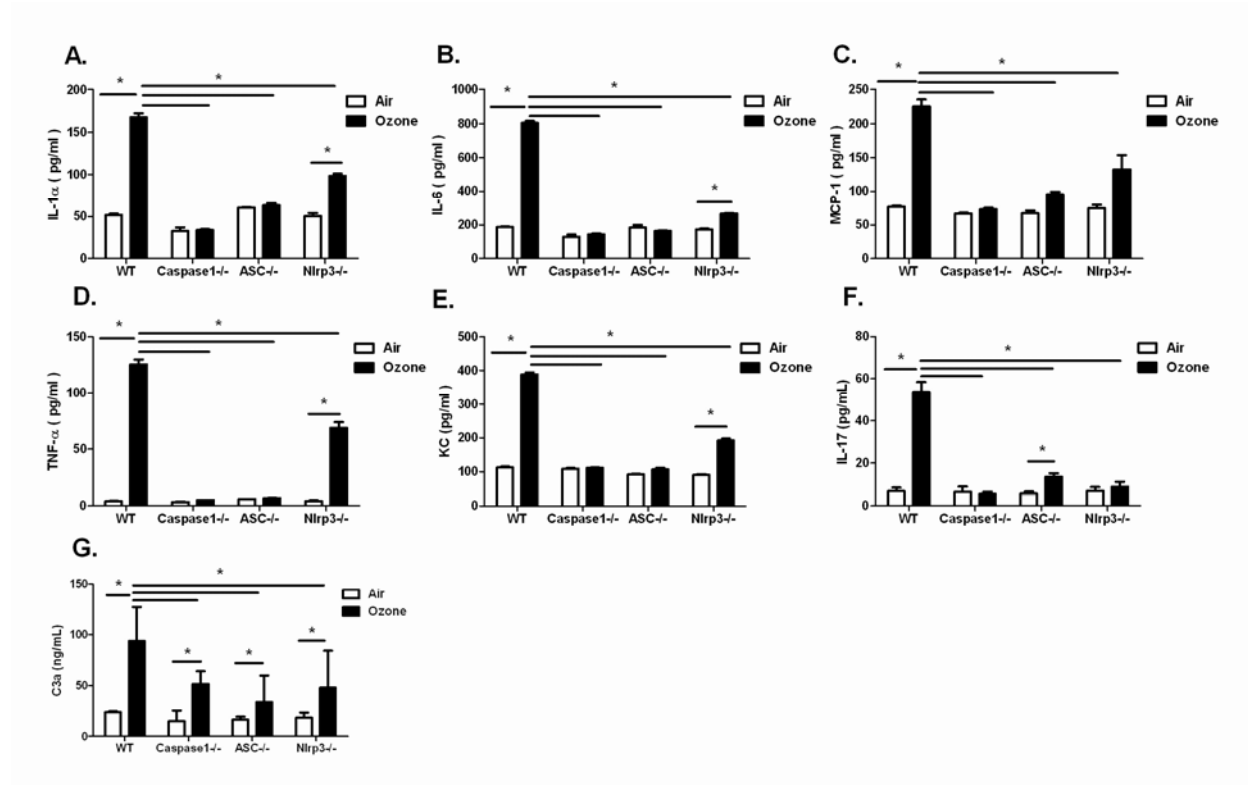

**Figure S2. Level of non-inflammasome pro-inflammatory factors in BAL at 24 hours after ozone exposure.** BAL IL-1 $\alpha$ , IL-6, monocyte chemoattractant protein-1(MCP-1), tumor necrosis factor- $\alpha$  (TNF- $\alpha$ ), keratinocyte-derived chemokine (KC), IL-17, and C3a were increased with ozone exposure, and MCP-1 was totally dependent on the presence of Nlrp3-inflammasome, including caspase1, ASC and Nlrp3; IL-1 $\alpha$ , IL-6, TNF- $\alpha$  and KC were totally dependent on caspase1 and ASC and partially dependent on Nlrp3; IL-17 was partially dependent on ASC; C3a was partially dependent on Nlrp3-inflammasomes after ozone exposure. Data presented as mean  $\pm$  SEM and are representatives from two similar experiments(n=5, \* $p$  < 0.05).

**Figure S3.**

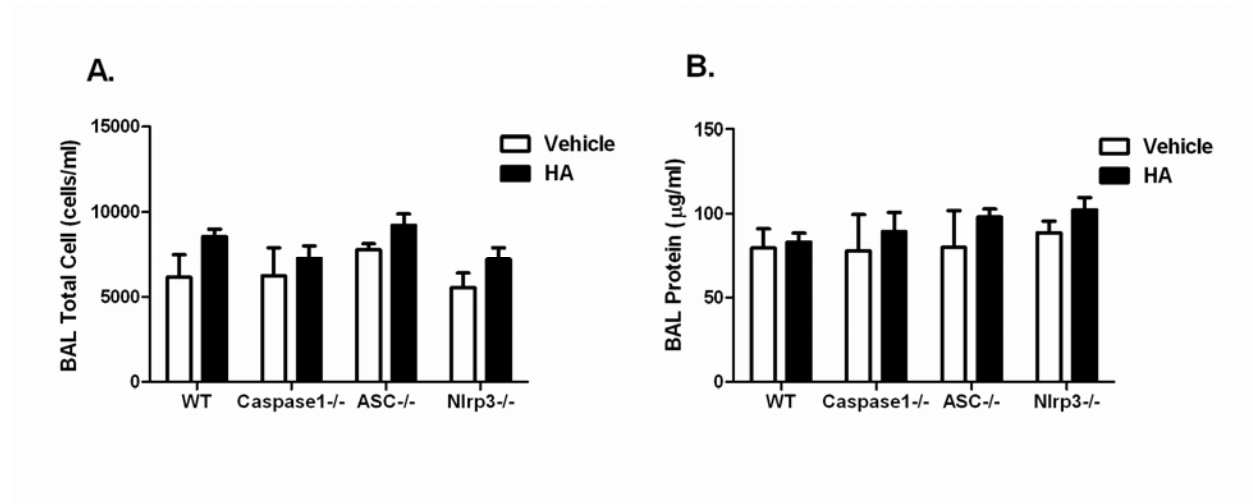

**Figure S3. Biological response to hyaluronan and genes of the Nlrp3-inflammasome. (A)**

The level of total cells in bronchoalveolar lavage (BALF) was independent of challenge to hyaluronan. **(B)** The level of BALF protein was independent of hyaluronan exposure. Data presented as mean  $\pm$  SEM (n=5/group).

**Figure S4.**

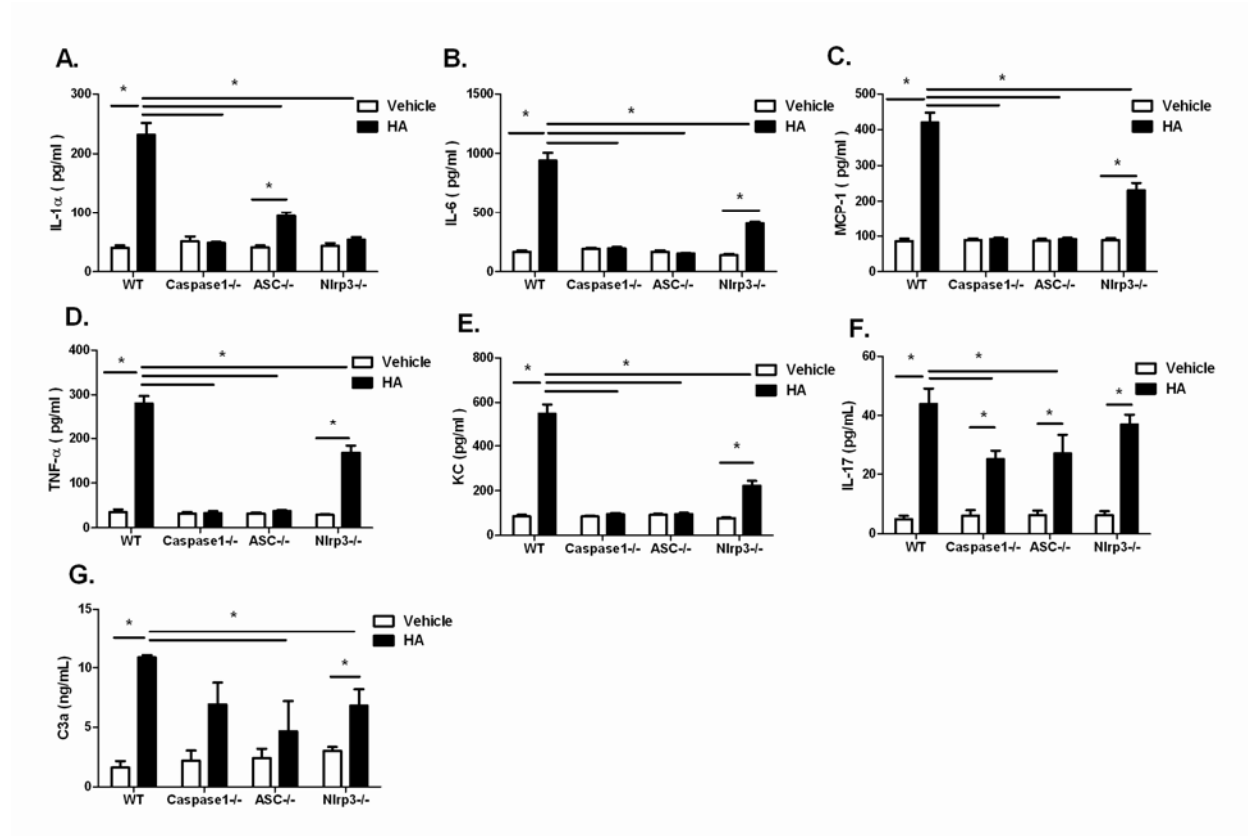

**Figure S4. Level of non-inflammasome pro-inflammatory factors in the BAL after HA exposure.** The release of BAL IL-6, MCP-1, TNF- $\alpha$  and KC were totally dependent on ASC and caspase1 and partially dependent on Nlrp3; IL-1 $\alpha$  was partially dependent on ASC. The level of IL-17 was partially dependent on caspase1 and ASC, but not dependent on Nlrp3; C3a was totally dependent on ASC and caspase1, and partially dependent on Nlrp3 after hyaluronan exposure. Data presented as mean  $\pm$  SEM and are representatives from two similar experiments (n=5, \*:  $p < 0.05$ ).
